# Supplementary material
Source: Springer Nature journal article supplement (https://www.springermedizin.de/resource/supplementary/12879_2012_2063_MOESM3_ESM.pdf/9443700)

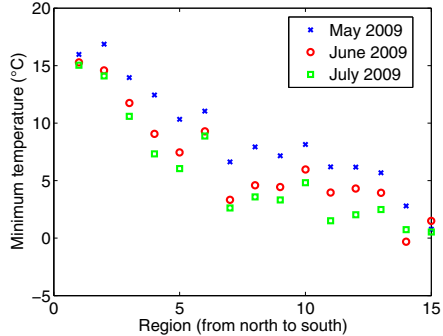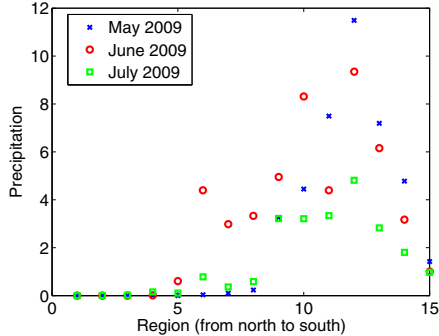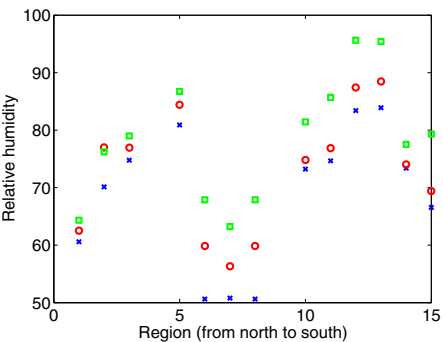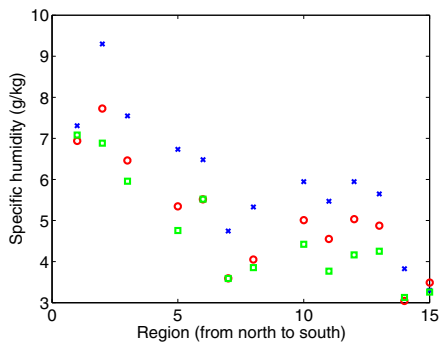

Supplement: MOESM3 [file 9443700]
